# Supplementary material for: Preparation and quantitative analysis of multicenter luminescence materials for sensing function
Source: Springer Nature journal article supplement (doi:10.1038/s41596-023-00810-1), 2023-02-27

## Reporting Summary

Nature Portfolio wishes to improve the reproducibility of the work that we publish. This form provides structure for consistency and transparency in reporting. For further information on Nature Portfolio policies, see our [Editorial Policies](#) and the [Editorial Policy Checklist](#).

Please do not complete any field with "not applicable" or n/a. Refer to the help text for what text to use if an item is not relevant to your study.

For final submission: please carefully check your responses for accuracy; you will not be able to make changes later.

## Statistics

For all statistical analyses, confirm that the following items are present in the figure legend, table legend, main text, or Methods section.

- n/a      Confirmed
- ☒ The exact sample size ( $n$ ) for each experimental group/condition, given as a discrete number and unit of measurement
  - ☒ A statement on whether measurements were taken from distinct samples or whether the same sample was measured repeatedly
  - ☒ The statistical test(s) used AND whether they are one- or two-sided  
*Only common tests should be described solely by name; describe more complex techniques in the Methods section.*
  - ☒ A description of all covariates tested
  - ☒ A description of any assumptions or corrections, such as tests of normality and adjustment for multiple comparisons
  - ☐
  - ☒ A full description of the statistical parameters including central tendency (e.g. means) or other basic estimates (e.g. regression coefficient) AND variation (e.g. standard deviation) or associated estimates of uncertainty (e.g. confidence intervals)
    - ☒ For null hypothesis testing, the test statistic (e.g.  $F$ ,  $t$ ,  $r$ ) with confidence intervals, effect sizes, degrees of freedom and  $P$  value noted  
*Give  $P$  values as exact values whenever suitable.*
    - ☒ For Bayesian analysis, information on the choice of priors and Markov chain Monte Carlo settings
    - ☒ For hierarchical and complex designs, identification of the appropriate level for tests and full reporting of outcomes
    - ☒ Estimates of effect sizes (e.g. Cohen's  $d$ , Pearson's  $r$ ), indicating how they were calculated

*Our web collection on [statistics for biologists](#) contains articles on many of the points above.*

## Software and code

Policy information about [availability of computer code](#)

|                 |                             |
|-----------------|-----------------------------|
| Data collection | Fluoracle 2.2.3             |
| Data analysis   | Microsoft Office Excel 2016 |

For manuscripts utilizing custom algorithms or software that are central to the research but not yet described in published literature, software must be made available to editors and reviewers. We strongly encourage code deposition in a community repository (e.g. GitHub). See the Nature Portfolio [guidelines for submitting code & software](#) for further information.

## Data

Policy information about [availability of data](#)

All manuscripts must include a [data availability statement](#). This statement should provide the following information, where applicable:

- Accession codes, unique identifiers, or web links for publicly available datasets
- A description of any restrictions on data availability
- For clinical datasets or third party data, please ensure that the statement adheres to our [policy](#)

There are no restrictions on data availability.

## Human research participants

Policy information about [studies involving human research participants](#) and [Sex and Gender in Research](#).

|                             |              |
|-----------------------------|--------------|
| Reporting on sex and gender | Not involved |
| Population characteristics  | Not involved |
| Recruitment                 | Not involved |
| Ethics oversight            | Not involved |

Note that full information on the approval of the study protocol must also be provided in the manuscript.

## Field-specific reporting

Please select the one below that is the best fit for your research. If you are not sure, read the appropriate sections before making your selection.

- ☐ Life sciences
- ☐ Behavioural & social sciences
- ☒ Ecological, evolutionary & environmental sciences

## Life sciences study design

All studies must disclose on these points even when the disclosure is negative.

|                 |  |
|-----------------|--|
| Sample size     |  |
| Data exclusions |  |
| Replication     |  |
| Randomization   |  |
| Blinding        |  |

## Behavioural & social sciences study design

All studies must disclose on these points even when the disclosure is negative.

|                   |  |
|-------------------|--|
| Study description |  |
| Research sample   |  |
| Sampling strategy |  |
| Data collection   |  |
| Timing            |  |
| Data exclusions   |  |
| Non-participation |  |
| Randomization     |  |

## Ecological, evolutionary & environmental sciences study design

All studies must disclose on these points even when the disclosure is negative.

|                          |                                                                                                                                         |
|--------------------------|-----------------------------------------------------------------------------------------------------------------------------------------|
| Study description        | This protocol aims to provide timely and facile guidelines for the material design principle, sensing procedure and analysis method. to |
| Research sample          | Metal-organic frameworks.                                                                                                               |
| Sampling strategy        | No sample size calculation was performed.                                                                                               |
| Data collection          | We recorded the data by a FS5 fluorescence spectrophotometer.                                                                           |
| Timing and spatial scale | Procedure 1                                                                                                                             |
| Data exclusions          | No data were excluded from the analyses.                                                                                                |
| Reproducibility          | All attempts to repeat the experiment were successful.                                                                                  |
| Randomization            | Samples were ground to fine powder and dispersed into solvents by ultrasonic for uniformity.                                            |

Blinding

Possible.

Did the study involve field work?

Yes

No

## Field work, collection and transport

Field conditions

Location

Access & import/export

Disturbance

## Reporting for specific materials, systems and methods

We require information from authors about some types of materials, experimental systems and methods used in many studies. Here, indicate whether each material, system or method listed is relevant to your study. If you are not sure if a list item applies to your research, read the appropriate section before selecting a response.

Materials & experimental systems

n/a

Involved in the study

Antibodies

Eukaryotic cell lines

Palaeontology and archaeology

Animals and other organisms

Clinical data

Dual use research of concern

Methods

n/a

Involved in the study

ChIP-seq

Flow cytometry

MRI-based neuroimaging

## Antibodies

Antibodies used

Validation

## Eukaryotic cell lines

Policy information about cell lines and Sex and Gender in Research

Cell line source(s)

Authentication

Mycoplasma contamination

Commonly misidentified lines (See ICLAC register)

## Palaeontology and Archaeology

Specimen provenance

Specimen deposition

Dating methods

Tick this box to confirm that the raw and calibrated dates are available in the paper or in Supplementary Information.

Ethics oversight

Note that full information on the approval of the study protocol must also be provided in the manuscript.

## Animals and other research organisms

Policy information about studies involving animals; ARRIVE guidelines recommended for reporting animal research, and Sex and Gender in Research

|                         |                      |
|-------------------------|----------------------|
| Laboratory animals      | <input type="text"/> |
| Wild animals            | <input type="text"/> |
| Reporting on sex        | <input type="text"/> |
| Field-collected samples | <input type="text"/> |
| Ethics oversight        | <input type="text"/> |

Note that full information on the approval of the study protocol must also be provided in the manuscript.

Clinical data

Policy information about [clinical studies](#)  
All manuscripts should comply with the ICMJE [guidelines for publication of clinical research](#) and a completed [CONSORT checklist](#) must be included with all submissions.

|                             |                      |
|-----------------------------|----------------------|
| Clinical trial registration | <input type="text"/> |
| Study protocol              | <input type="text"/> |
| Data collection             | <input type="text"/> |
| Outcomes                    | <input type="text"/> |

Dual use research of concern

Policy information about [dual use research of concern](#)

**Hazards**  
Could the accidental, deliberate or reckless misuse of agents or technologies generated in the work, or the application of information presented in the manuscript, pose a threat to:

|                       |                                                  |
|-----------------------|--------------------------------------------------|
| No                    | Yes                                              |
| <input type="radio"/> | <input type="radio"/> Public health              |
| <input type="radio"/> | <input type="radio"/> National security          |
| <input type="radio"/> | <input type="radio"/> Crops and/or livestock     |
| <input type="radio"/> | <input type="radio"/> Ecosystems                 |
| <input type="radio"/> | <input type="radio"/> Any other significant area |

Experiments of concern

Does the work involve any of these experiments of concern:

|                       |                                                                                                   |
|-----------------------|---------------------------------------------------------------------------------------------------|
| No                    | Yes                                                                                               |
| <input type="radio"/> | <input type="radio"/> Demonstrate how to render a vaccine ineffective                             |
| <input type="radio"/> | <input type="radio"/> Confer resistance to therapeutically useful antibiotics or antiviral agents |
| <input type="radio"/> | <input type="radio"/> Enhance the virulence of a pathogen or render a nonpathogen virulent        |
| <input type="radio"/> | <input type="radio"/> Increase transmissibility of a pathogen                                     |
| <input type="radio"/> | <input type="radio"/> Alter the host range of a pathogen                                          |
| <input type="radio"/> | <input type="radio"/> Enable evasion of diagnostic/detection modalities                           |
| <input type="radio"/> | <input type="radio"/> Enable the weaponization of a biological agent or toxin                     |
| <input type="radio"/> | <input type="radio"/> Any other potentially harmful combination of experiments and agents         |

ChIP-seq

**Data deposition**  
☐ Confirm that both raw and final processed data have been deposited in a public database such as [GEO](#).  
☐ Confirm that you have deposited or provided access to graph files (e.g. BED files) for the called peaks.

|                                                                   |                      |
|-------------------------------------------------------------------|----------------------|
| Data access links<br><i>May remain private before publication</i> | <input type="text"/> |
| Files in database submission                                      | <input type="text"/> |
| Genome browser session<br>(e.g. <a href="#">UCSC</a> )            | <input type="text"/> |

Methodology

|                         |                      |
|-------------------------|----------------------|
| Replicates              | <input type="text"/> |
| Sequencing depth        | <input type="text"/> |
| Antibodies              | <input type="text"/> |
| Peak calling parameters | <input type="text"/> |
| Data quality            | <input type="text"/> |
| Software                | <input type="text"/> |

## Flow Cytometry

### Plots

- Confirm that:
- ☐ The axis labels state the marker and fluorochrome used (e.g. CD4-FITC).
  - ☐ The axis scales are clearly visible. Include numbers along axes only for bottom left plot of group (a 'group' is an analysis of identical markers).
  - ☐ All plots are contour plots with outliers or pseudocolor plots.
  - ☐ A numerical value for number of cells or percentage (with statistics) is provided.

### Methodology

|                           |                      |
|---------------------------|----------------------|
| Sample preparation        | <input type="text"/> |
| Instrument                | <input type="text"/> |
| Software                  | <input type="text"/> |
| Cell population abundance | <input type="text"/> |
| Gating strategy           | <input type="text"/> |

☐ Tick this box to confirm that a figure exemplifying the gating strategy is provided in the Supplementary Information.

## Magnetic resonance imaging

### Experimental design

|                                 |                      |
|---------------------------------|----------------------|
| Design type                     | <input type="text"/> |
| Design specifications           | <input type="text"/> |
| Behavioral performance measures | <input type="text"/> |

### Acquisition

|                               |                                                                      |
|-------------------------------|----------------------------------------------------------------------|
| Imaging type(s)               | <input type="text"/>                                                 |
| Field strength                | <input type="text"/>                                                 |
| Sequence & imaging parameters | <input type="text"/>                                                 |
| Area of acquisition           | <input type="text"/>                                                 |
| Diffusion MRI                 | <input checked="" type="radio"/> Used <input type="radio"/> Not used |

### Preprocessing

|                            |                      |
|----------------------------|----------------------|
| Preprocessing software     | <input type="text"/> |
| Normalization              | <input type="text"/> |
| Normalization template     | <input type="text"/> |
| Noise and artifact removal | <input type="text"/> |
| Volume censoring           | <input type="text"/> |

### Statistical modeling & inference

|                                                                           |                                                                                                         |
|---------------------------------------------------------------------------|---------------------------------------------------------------------------------------------------------|
| Model type and settings                                                   | <input type="text"/>                                                                                    |
| Effect(s) tested                                                          | <input type="text"/>                                                                                    |
| Specify type of analysis:                                                 | <input checked="" type="radio"/> Whole brain <input type="radio"/> ROI-based <input type="radio"/> Both |
| Statistic type for inference<br>(See <a href="#">Eklund et al. 2016</a> ) | <input type="text"/>                                                                                    |
| Correction                                                                | <input type="text"/>                                                                                    |

Models & analysis

|                                               |                                              |
|-----------------------------------------------|----------------------------------------------|
| n/a                                           | Involvement in the study                     |
| <input checked="" type="checkbox"/>           | Functional and/or effective connectivity     |
| <input checked="" type="checkbox"/>           | Graph analysis                               |
| <input checked="" type="checkbox"/>           | Multivariate modeling or predictive analysis |
| Functional and/or effective connectivity      | <input type="text"/>                         |
| Graph analysis                                | <input type="text"/>                         |
| Multivariate modeling and predictive analysis | <input type="text"/>                         |

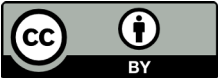

Supplement: MOESM2 [file 41596_2023_810_MOESM2_ESM25.pdf]
